# Supplementary material
Source: PubMed Central journal article supplement (PMC6830782)
Supplement: ASN.2019020150SupplementaryData.pdf [file ASN.2019020150SupplementaryData.pdf]

## Supplemental Material Table of Contents

### Supplemental Methods

### Supplemental References

### Supplemental Figures

Supplemental Figure 1. Additional phenotypic characterization of *Pkhd1-Pkd1* mutant mice

Supplemental Figure 2. The *Pkhd1-Pkd1* genetic interaction is dosage dependent

Supplemental Figure 3. Characterization of *Pkd1* mutant rats

Supplemental Figure 4. FPC expression and maturation is tightly regulated

Supplemental Figure 5. Additional analysis of DEG profiles

### Supplemental Tables

Supplemental Table 1. Sexual dimorphism in renal phenotype

Supplemental Table 2. Animals used in RNAseq analysis

Supplemental Table 3. Differential expressed genes in *Pkhd1*<sup>-/-</sup>, *Pkd1*<sup>RC/RC</sup> and digenic kidneys (Attached separately)

Supplemental Table 4. *Pkhd1*<sup>-/-</sup>, *Pkd1*<sup>RC/RC</sup> and digenic gene set enrichment analysis

Supplemental Table 5. Merged cilia-associated annotated gene list from Gene Ontology Consortium

### Supplemental Methods

*Generation of Pkd1 rat model.* *Pkd1* mutant rats (LEW-*Pkd1*<sup>em6M<sub>cwi</sub></sup>; RGDID: 10054439) were produced by TALEN mutagenesis. Messenger RNAs (5ng/uL each) encoding TALENS targeting the *Pkd1* exon 29 target sequence 5'- ATGGGACAGGCCACCTCGTAG[CCGCTTTA]CTAGAGTCCAGAGGGTT-3' were injected into the pronucleus of Lew/NCrl (Charles River Laboratories) rat embryos. Individual TALEN monomer binding sites are underlined. Founder animals were screened using the Cel-I nuclease assay as previously described<sup>2</sup> and a founder animal harboring an 8-bp deletion mutation (CCGCTTTA) in exon 29 (bracketed in the target sequence above) was identified by Sanger sequencing (not shown). This founder was backcrossed to the parental Lew/NCrl strain and subsequent litters were genotyped by fragment analysis<sup>3</sup> using fluorescently-labeled M13-tagged primers Pkd1\_F: 5'-M13-CAGTGACGGGCGGTTCACTG-3' and Pkd1\_R: 5'-CCTTACTCCGGGACATCCGG-3'.

*Blood urea nitrogen measures.* Blood was collected from rats at time of sacrifice via cardiac puncture and blood plasma isolated by centrifugation for 15min at 1,500 rpms. BUN levels were measured in duplicate from 1:2 diluted plasma using Quantichrome urea assay kits (Bioassay Systems, Cat#DIUR-100) according to the **protocol**.

*IF labeling.* Tissues were prepared for IF labeling as previously described. Biotinylated-LTA (1:250, Vector Laboratories) and rabbit anti-AQP2 (1:1000, ProSci Cat#7621) were used to label proximal tubules and collecting ducts, respectively. DAPI was used to counterstain nuclei.

### **Supplemental References**

1. Jat, PS, Noble, MD, Ataliotis, P, Tanaka, Y, Yannoutsos, N, Larsen, L, Kioussis, D: Direct derivation of conditionally immortal cell lines from an H-2Kb-tsA58 transgenic mouse. *Proc Natl Acad Sci U S A*, 88: 5096-5100, 1991.
2. Geurts, AM, Cost, GJ, Remy, S, Cui, X, Tesson, L, Usal, C, Menoret, S, Jacob, HJ, Anegon, I, Buelow, R: Generation of gene-specific mutated rats using zinc-finger nucleases. *Methods Mol Biol*, 597: 211-225, 2010.
3. Moreno, C, Kennedy, K, Andrae, JW, Jacob, HJ: Genome-wide scanning with SSLPs in the rat. *Methods Mol Med*, 108: 131-138, 2005.
4. Eden, E, Navon, R, Steinfeld, I, Lipson, D, Yakhini, Z: GOrilla: a tool for discovery and visualization of enriched GO terms in ranked gene lists. *BMC Bioinformatics*, 10: 48, 2009.
5. Eden, E, Lipson, D, Yogev, S, Yakhini, Z: Discovering motifs in ranked lists of DNA sequences. *PLoS Comput Biol*, 3: 508-522, 2007.

## Supplemental Figures

# Supp Fig 1

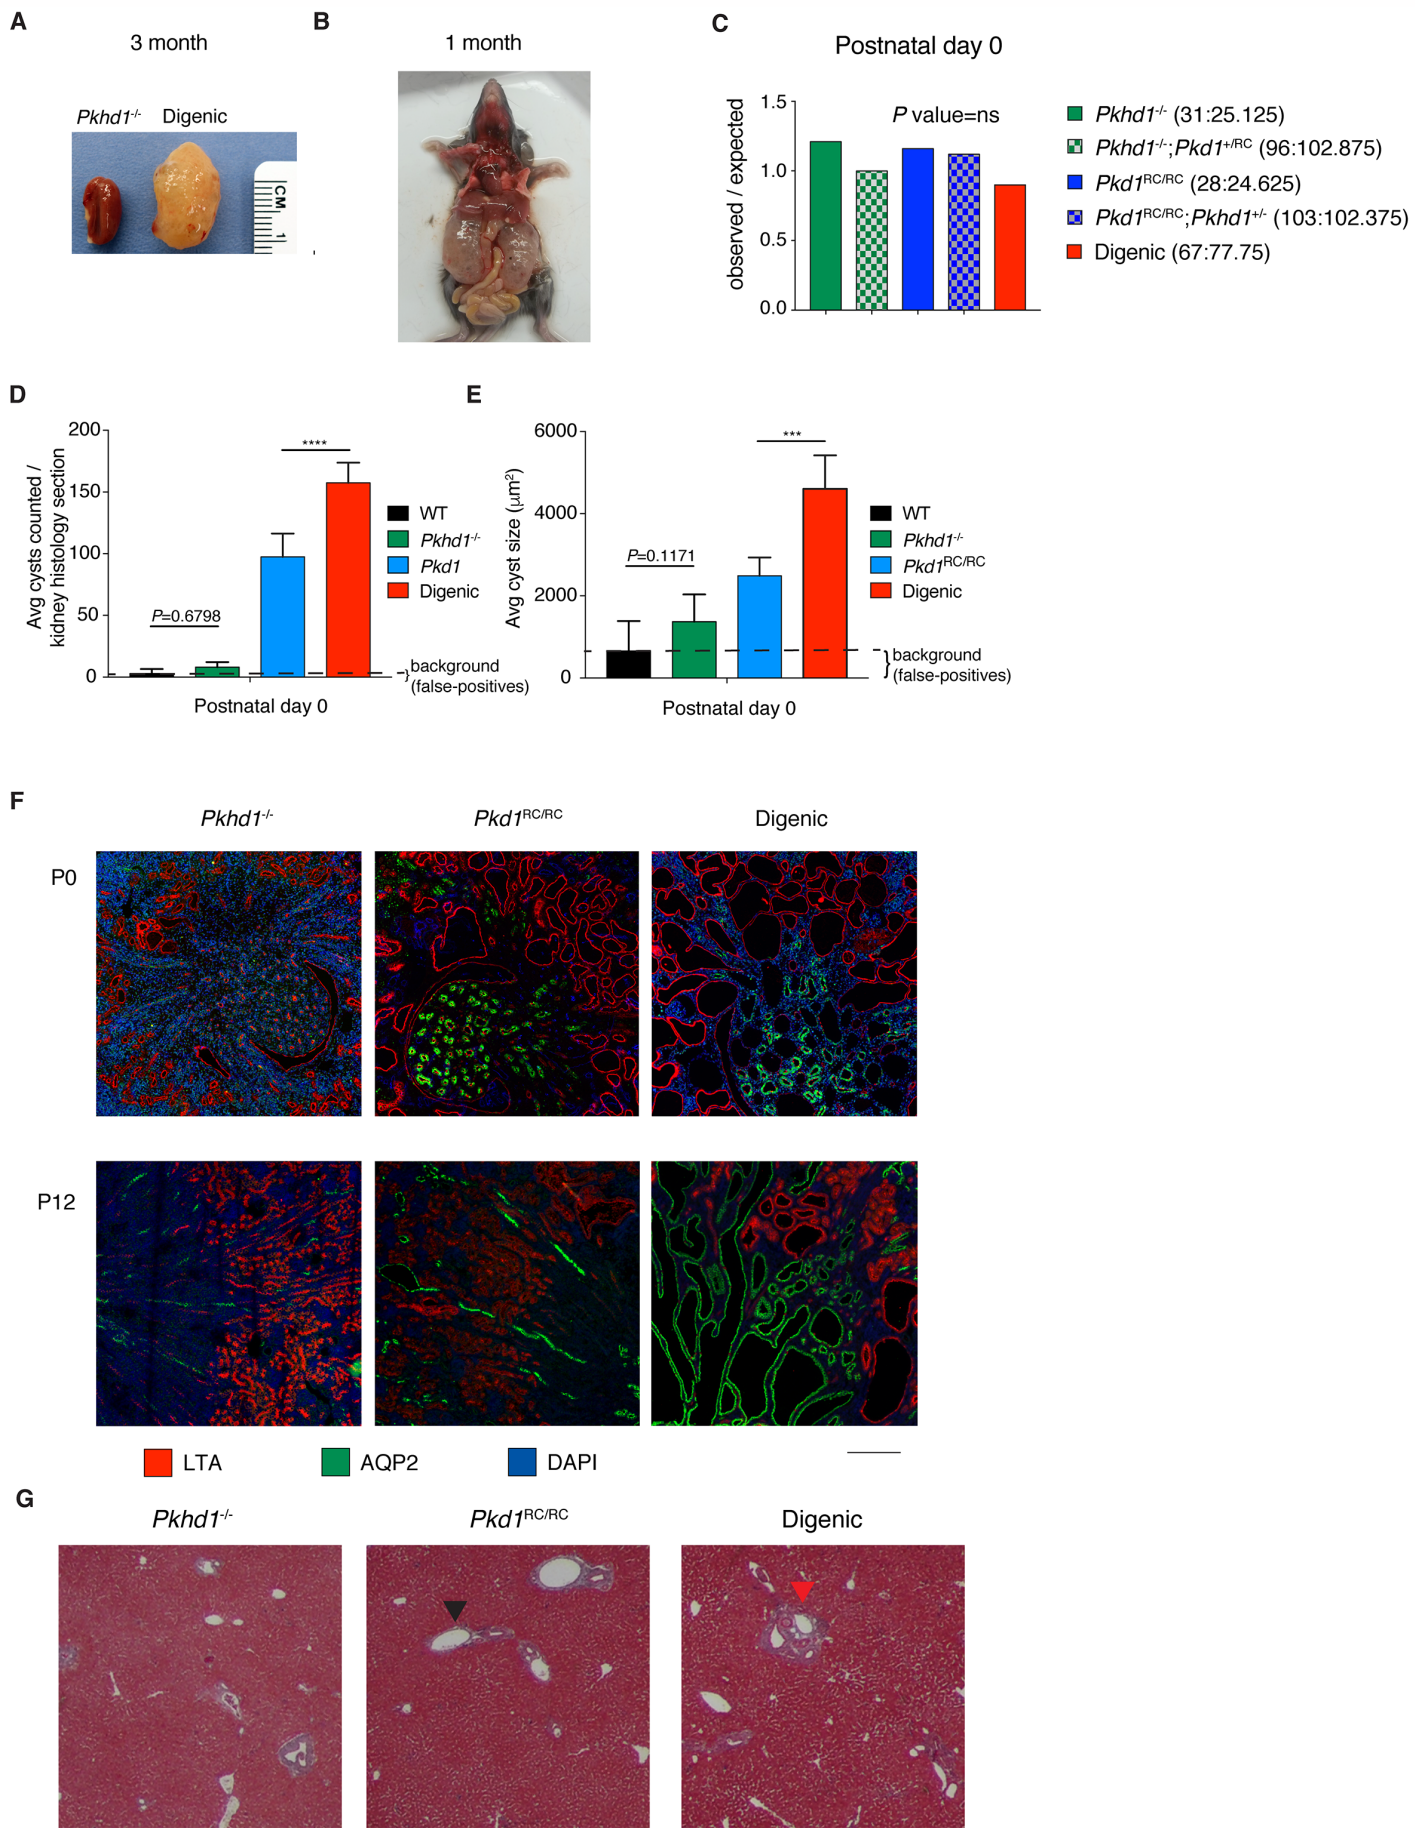



**Supplemental Figure 1. Additional phenotypic characterization of *Pkhd1*-*Pkd1* mutant mice.** (A-B) Picture of excised digenic and *Pkhd1*<sup>-/-</sup> kidneys from mice aged to 3 months (A) or 1m old digenic mouse with exposed thoracic and abdominal cavity (B), illustrating the severity of the disease. (C) Analysis of number of animals born vs expected (observed/expected) shows that the digenic animals are not significantly underrepresented at P0 ( $P=0.6338$ ). (D) Cyst number ( $\geq 500\mu\text{m}^2$ ) and (E) average cyst area of the homozygous and digenic genotypes at P0. Digenic kidneys were more severely affected than *Pkd1*<sup>RC/RC</sup>. Note, there was a slight increase, albeit insignificant, in cystic lesions in *Pkhd1*<sup>-/-</sup> kidneys compared to WT controls. Values were obtained from analysis of a single histological section taken from 5 mice per genotype. (F) IF labeling of kidney sections from P0 and P12 *Pkhd1*<sup>-/-</sup>, *Pkd1*<sup>RC/RC</sup> and digenic mice. Proximal tubules (PT) were stained with the lectin LTA (red) and collecting-ducts (CD) with an antibody to AQP2 (green), and counterstained with DAPI, 10x magnification. Scale bar = 200 $\mu\text{m}$ . (G) Masson's Trichrome stained section of P12 *Pkhd1*<sup>-/-</sup>, *Pkd1*<sup>RC/RC</sup> and digenic livers. Black arrow denotes normal ductal plate and red arrow denotes ductal plate malformation. Scale bar=200 $\mu\text{m}$ . Statistical values were obtained by Chi square analysis or one-way ANOVA, followed by Tukey's multiple comparisons test where appropriate ( $*P < 0.05$ ,  $**P < 0.01$ ,  $***P < 0.001$ ,  $****P < 0.0001$ ); error bars indicate  $\pm\text{SD}$ .

Supp Fig 2

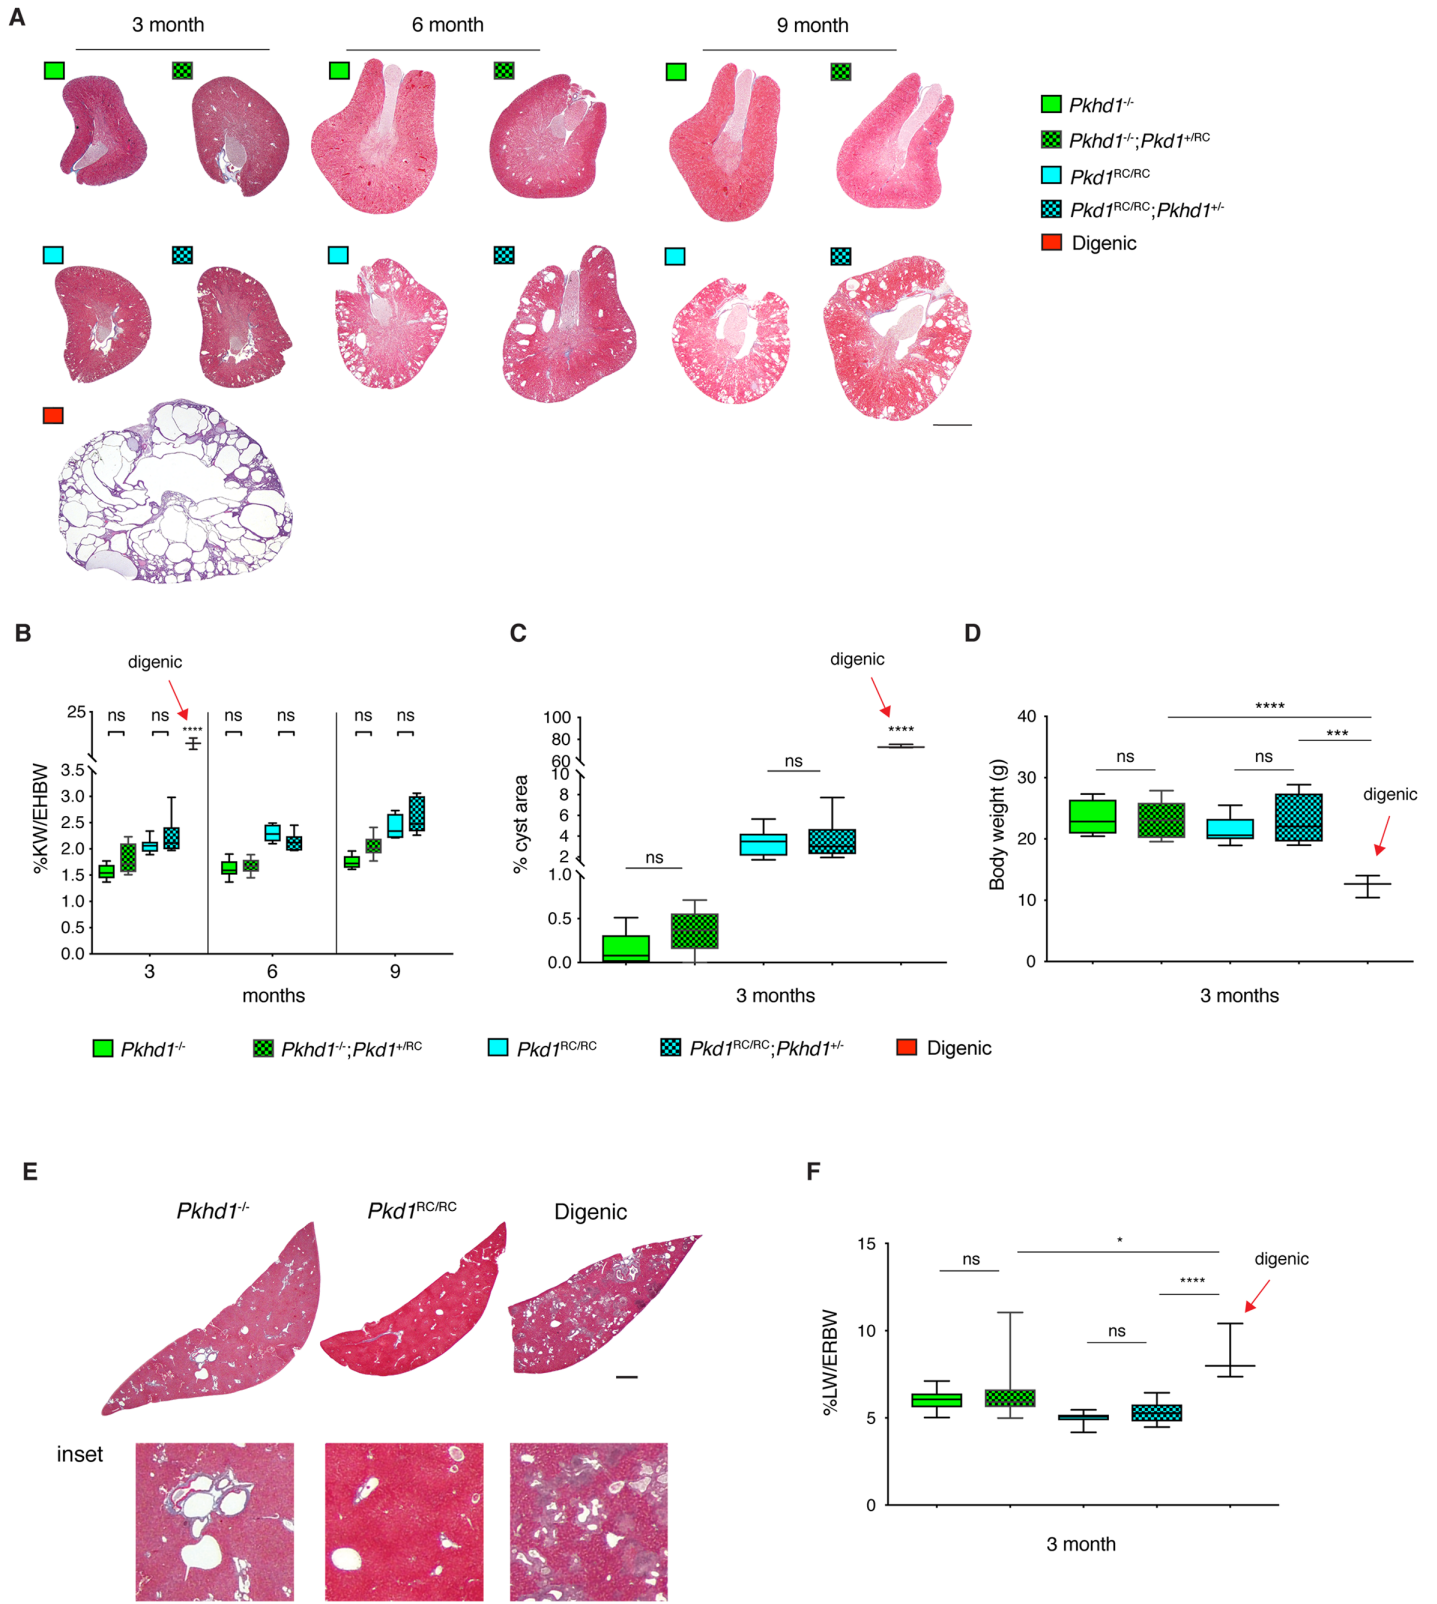

**Supplemental Figure 2. The *Pkhd1*-*Pkd1* genetic interaction is dosage dependent.** (A) Representative Masson's Trichrome stained kidney sections from the five different genotypes at 3m, and 6 and 9m, without

digenic kidneys as no animals survived past 3m. The synergist interaction in the digenic animals is clearly shown with the hugely enlarged kidney. Scale bar = 1mm. (B) Graphical representation of %KW/EHBW at 3, 6 and 9m showing that addition of a single allele of the other genotype ( $Pkd1^{+/RC}$  plus  $Pkhd1^{-/-}$  or  $Pkhd1^{+/-}$  plus  $Pkd1^{RC/RC}$ ) is not sufficient to modify the kidney disease, whereas digenic mice have greatly enlarged kidneys at 3m. Liver weight was subtracted from gross body weight as  $Pkhd1^{-/-}$  animals present significant gross enlargement in liver disease by 6m (data not shown). (C) Cyst kidney area, as a percentage of total kidney area, at 3m compares the five genotypic groups (n=10 per genotype, with the exception of digenic [n=3]). (D) Body weight (g) of mutant mice at 3m showing that only digenic mice have significant growth retardation, confounding the KW/EHBW measurements. (E) Masson's Trichrome sections of liver histology showing a significant increase of ductal plate malformation and fibrosis by 3m in digenic mice compared to the homozygous animals. Scale bar = 500 $\mu$ m liver cross-section; 150 $\mu$ m inset. (F) Percent liver weight per ex-renal body weight (%LW/ERBW) of the various genotypes at 3m showing a significant increase in the digenic animals. For 3, 6 and 9 month analysis, n=10 per genotype per timepoint (exception, n=3 digenic animals). Statistical values were obtained by one-way ANOVA, followed by Tukey's multiple comparisons test (\* $P$  <0.05, \*\* $P$  <0.01, \*\*\* $P$  <0.001, \*\*\*\* $P$  <0.0001); error bars indicate  $\pm$ SD.

### Supp Fig 3

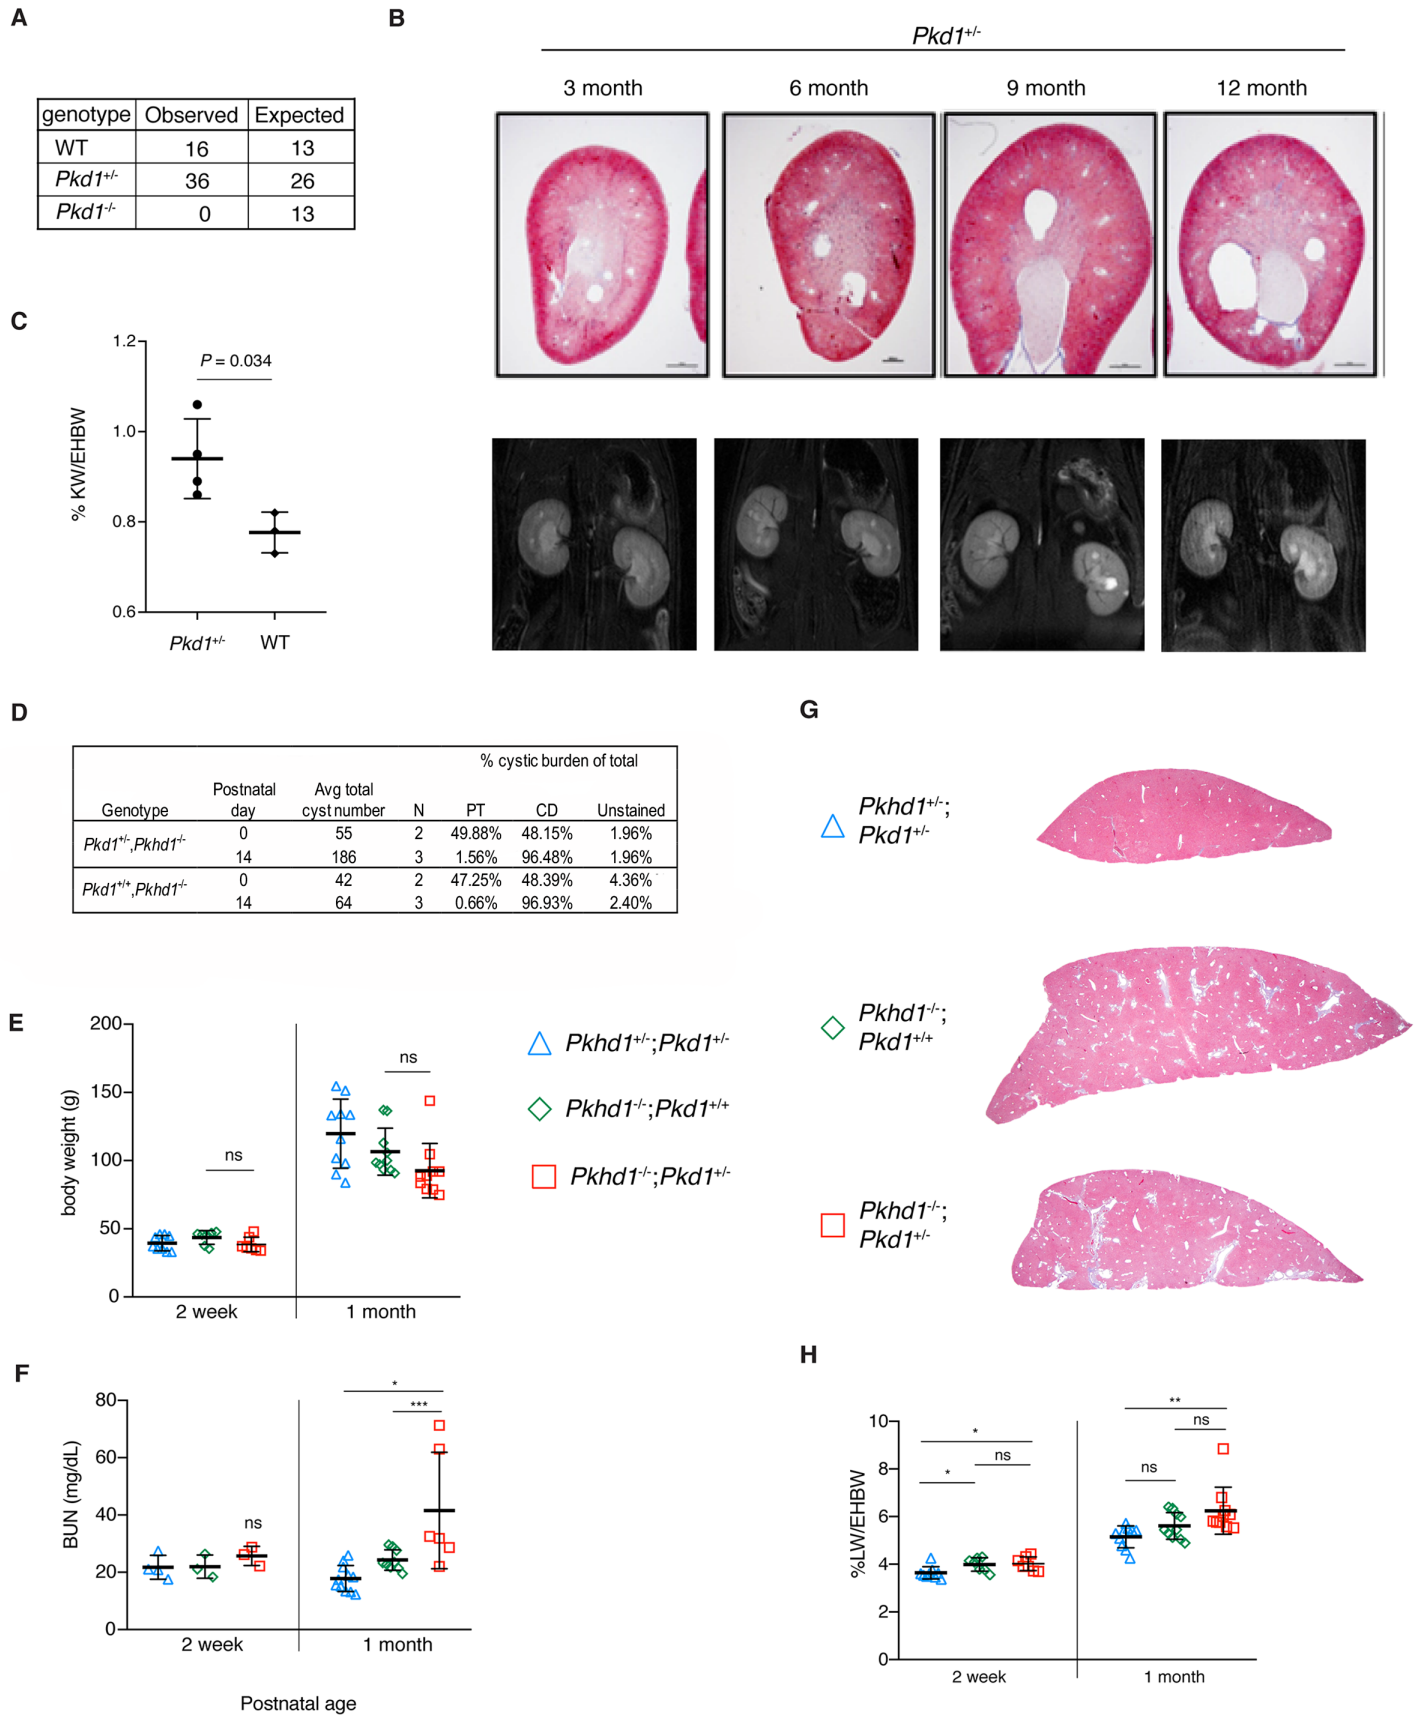

**Supplemental Figure 3. Characterization of *Pkd1* mutant rats.** (A) Analysis of observed animals born vs expected from *Pkd1*<sup>+/-</sup> heterozygous crosses. No *Pkd1*<sup>-/-</sup> animals were born. (B) Masson's Trichrome stain and MR imaging of kidneys from *Pkd1*<sup>+/-</sup> rats aged to 3, 6, 9 and 12m. (C) Graphical representation of %KW/EHBW of *Pkhd1*<sup>+/-</sup> at 12m compared to WT controls (n=4 vs 3, respectively). (D) Calculation of tubule-derived cystic burden as a fraction of total cystic burden for the digenic and *Pkd1*<sup>-/-</sup> animals at P0 and P14. N represents the number of animals used in each analysis. (E-F) Graphical representation of BW and BUN measurements from 2w and 1m old animals. (E) No significant difference in BW was observed between the different genetic cohorts. (F) BUN levels were significantly higher in *Pkhd1*<sup>-/-</sup>;*Pkd1*<sup>+/-</sup> plasma only at 1m. (G-H) Masson's Trichrome stain of representative liver sections from animals 1m old (G) and graphical analysis of LW/ERBW at 2w and 1m (H) showing no significant change in liver disease due to heterozygous loss of *Pkd1* in the *Pkhd1*<sup>-/-</sup> background. Scale bar = 1000µm. Liver disease was not significantly worse due to the loss of *Pkd1* in *Pkhd1* null rats. Statistical values were obtained by Chi square analysis, Student's *T* test, or one-way ANOVA, followed by Tukey's multiple comparisons test where appropriate (\**P* <0.05, \*\**P* <0.01, \*\*\**P* <0.001, \*\*\*\**P* <0.0001); error bars indicate ±SD.

**Supp Fig 4**

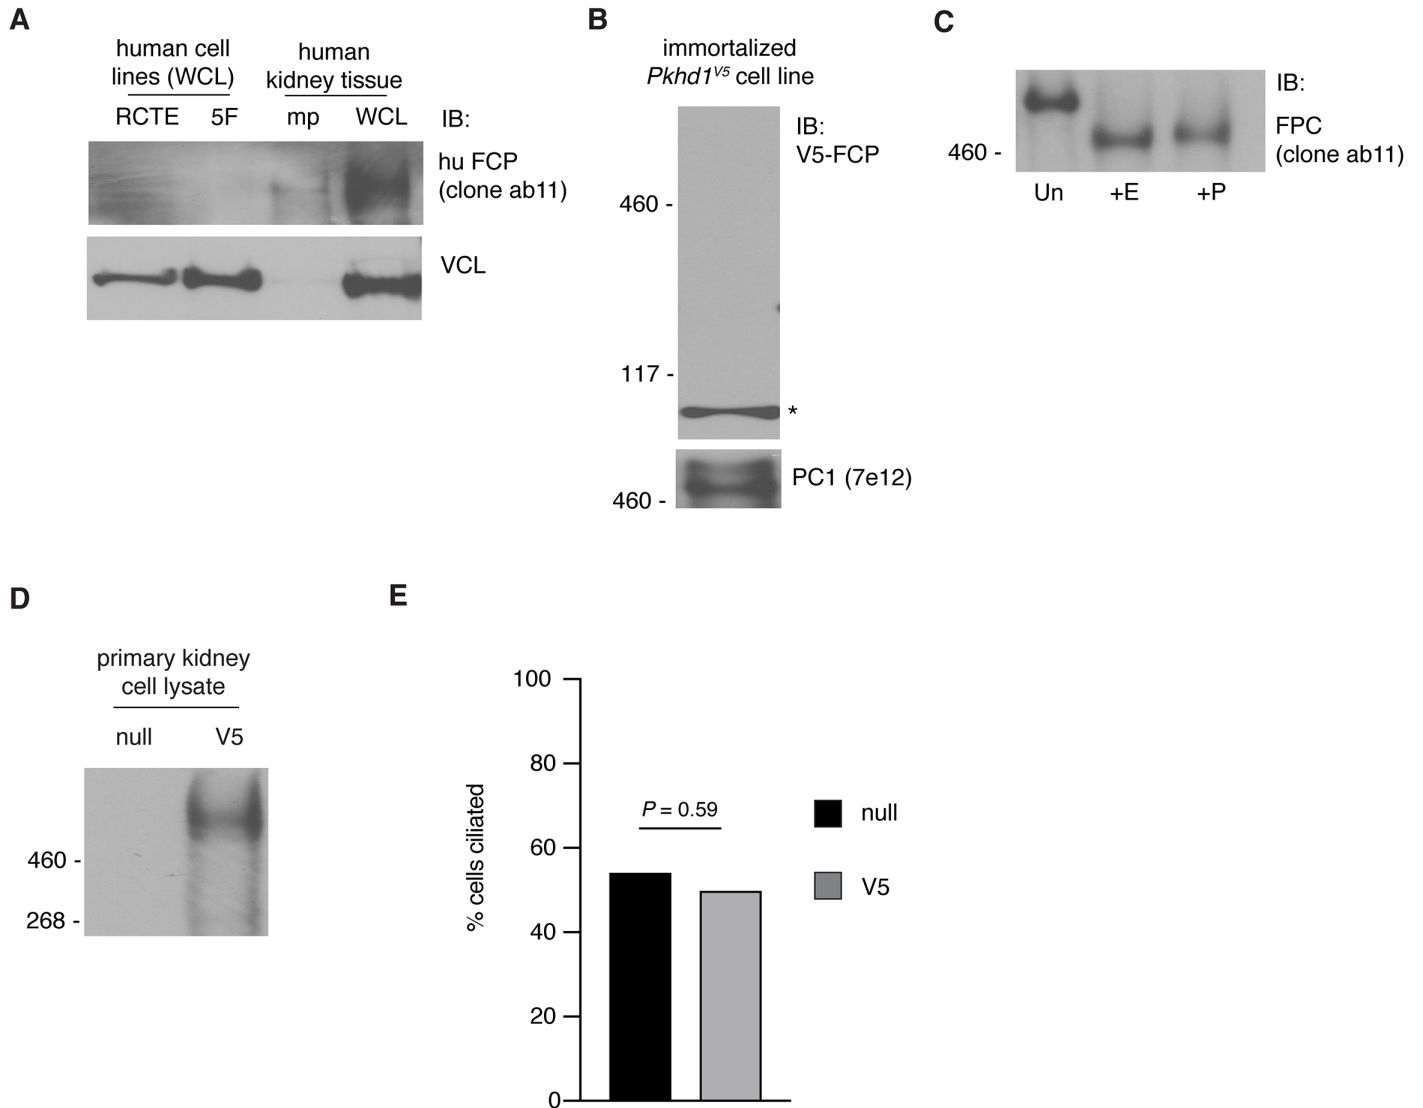

**Supplemental Figure 4. FPC expression and maturation is tightly regulated.** (A) IB of endogenous FPC expression in two transformed human kidney epithelial cell lines and normal human kidney tissue using a huFPC antibody (clone ab11). FPC was only detectable in human kidney tissue. RCTE, renal cortical tubular epithelial; 5F, immortalized ADPKD-PKD1 patient kidney cell line; mp, membrane-prep; WCL, whole cell lysate. (B) FPC was not detected by western blot in immortalized *Pkhd1<sup>V5</sup>* cells generated by crossing *Pkhd1<sup>V5/V5</sup>* mice with the Immortomouse carrying the H-2Kb-tsa58 transgene allowing for interferon-inducible expression of generated cell lines<sup>1</sup>, but PC1 is expressed. (C) Deglycosylation analysis in RCTE cell lysate transfected with N-terminal tagged SV5-Pk FPC construct. Exogenously expressed FPC did not recapitulate the maturation of endogenously expressed protein (see Figure 3D). (D) IB of lysate from *Pkhd1<sup>-/-</sup>* (null) or *Pkhd1<sup>V5</sup>* (V5) cultured cells showing V5 antibody specificity. (E) Quantification of total cells (DAPI) that had detectable primary cilia (Ac. tubulin) in

cultured *Pkhd1*<sup>-/-</sup> (null) or *Pkhd1*<sup>V5</sup> (V5) primary cells (see Figure 3E for IF image). Counts: null, 411 cilia in 770 total cells (53.4%); V5, 486 cilia in 953 total cells (51%). No significant difference was observed, 2-tailed Fisher's exact test.



Supp Fig 5

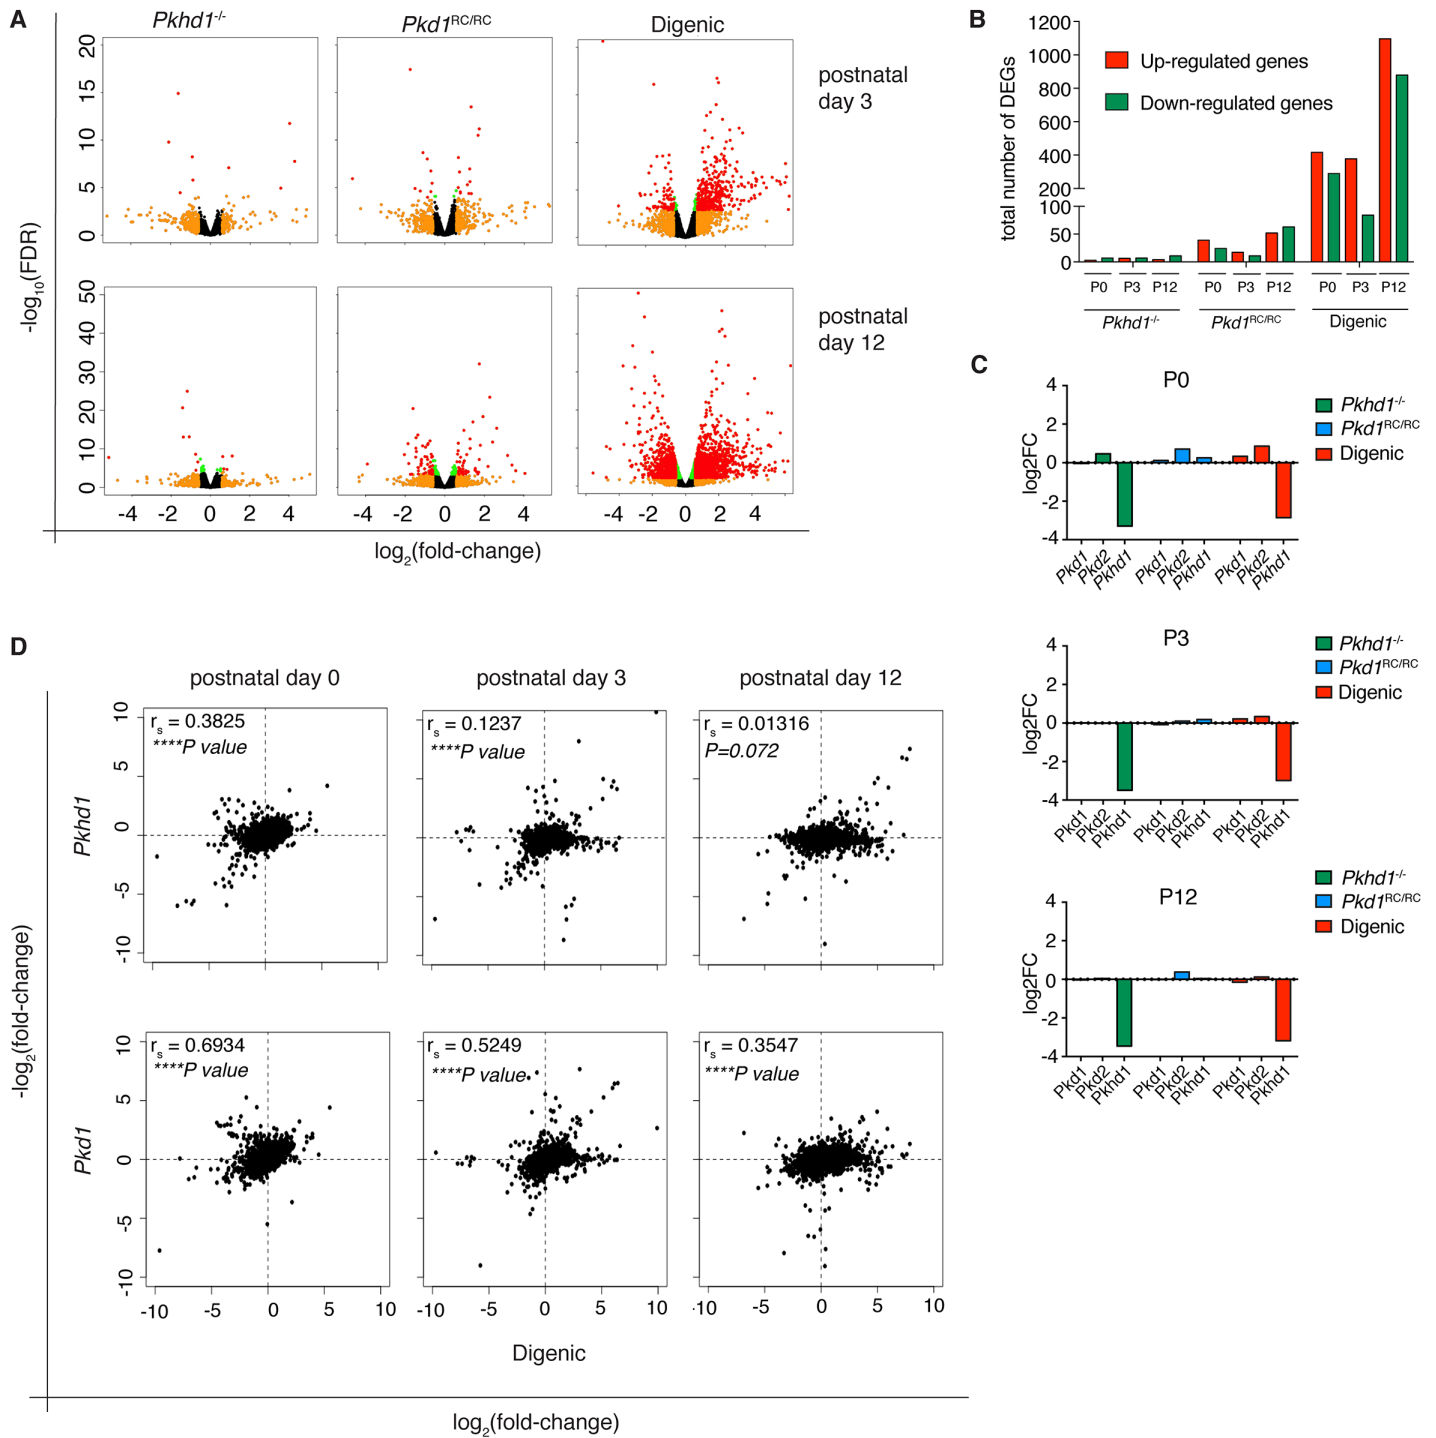

**Supplemental Figure 5. Additional analysis of DEG profiles and Gene Set Enrichment Analysis (GSEA).**

(A) Volcano plots of DEGs in *Pkhd1<sup>-/-</sup>*, *Pkd1<sup>RC/RC</sup>* and digenic kidneys at P3 and P12. Red denotes  $\log_2\text{FC} \geq 0.585$  and  $-\log_{10}\text{FDR} \geq 1.3$ ; orange,  $\log_2\text{FC} \geq 0.585$  only; green,  $-\log_{10}\text{FDR} \geq 1.3$  only. (B) Bar graph showing number of up- and down-regulated genes reaching significance ( $\log_2\text{FC} \geq 0.585$  and  $-\log_{10}\text{FDR} \geq 1.3$ ) in *Pkhd1<sup>-/-</sup>*, *Pkd1<sup>RC/RC</sup>* or digenic kidneys at P0, P3 and P12. Note at P12, there is a substantial increase in the number of DEGs in

digenic kidneys, likely due to secondary effects of cystogenesis. (C) RNA-seq data of *Pkd1*, *Pkd2* and *Pkhd1* expression in *Pkhd1*<sup>-/-</sup> (green) *Pkd1*<sup>RC/RC</sup> (blue) and digenic (red) kidneys at P0, P3 and P12. Only *Pkhd1* expression is significantly (FDR≤0.05) downregulated in both *Pkhd1*<sup>-/-</sup> and digenic mutant kidneys. (D) Scatterplots of homozygous compared to digenic kidney expression profiles (each normalized to WT controls) at P0, P3, and P12. Spearman's rank coefficient ( $r_s$ ) and ( $P$  values) are noted in top left corner of each plot. Pairwise comparisons indicate that expression profiles most strongly correlate at P0 relative to P3 and P12.

**Supplemental Table 1. Renal Analysis of sexual dimorphism**

| <b>Age</b> |                          | <b>Female,<br/>Pkh<sup>d1</sup><sup>-/-</sup></b> | <b>Male,<br/>Pkh<sup>d1</sup><sup>-/-</sup></b> | <b>Female,<br/>Pkd1<sup>RC/RC</sup></b> | <b>Male,<br/>Pkd1<sup>RC/RC</sup></b> | <b>Female,<br/>digenic</b> | <b>Male,<br/>digenic</b> |
|------------|--------------------------|---------------------------------------------------|-------------------------------------------------|-----------------------------------------|---------------------------------------|----------------------------|--------------------------|
| P0         | Number of values         | 5                                                 | 5                                               | 5                                       | 5                                     | 5                          | 5                        |
|            | Mean                     | 1.052                                             | 1.076                                           | 1.386                                   | 1.478                                 | 2.636                      | 2.746                    |
|            | Std. Deviation           | 0.1244                                            | 0.0695                                          | 0.2207                                  | 0.1224                                | 0.5391                     | 0.536                    |
|            | P value (Female vs Male) | 0.7162                                            |                                                 | 0.4386                                  |                                       | 0.7546                     |                          |
| P12        | Number of values         | 5                                                 | 5                                               | 5                                       | 5                                     | 5                          | 5                        |
|            | Mean                     | 1.314                                             | 1.188                                           | 1.66                                    | 1.72                                  | 4.998                      | 5.386                    |
|            | Std. Deviation           | 0.03912                                           | 0.08927                                         | 0.07649                                 | 0.1744                                | 0.6371                     | 1.106                    |
|            | P value (Female vs Male) | 0.0202                                            |                                                 | 0.501                                   |                                       | 0.5159                     |                          |
| P90        | Number of values         | 5                                                 | 5                                               | 5                                       | 5                                     |                            |                          |
|            | Mean                     | 1.504                                             | 1.418                                           | 1.9                                     | 1.914                                 |                            |                          |
|            | Std. Deviation           | 0.1616                                            | 0.06301                                         | 0.1427                                  | 0.08385                               |                            |                          |
|            | P value (Female vs Male) | 0.2999                                            |                                                 | 0.8547                                  |                                       |                            |                          |

**Supplemental Table 2. Animals used for RNAseq**

| General ID | Pkhd1 genotype | Pkd1 genotype | Gender | Age (day) | BW   | KW  | %KW/BW | ng/uL | A260/A280 |
|------------|----------------|---------------|--------|-----------|------|-----|--------|-------|-----------|
| MFC-375    | WT             | WT            | F      | 0         | 1391 | 14  | 1.01   | 309   | 2.08      |
| MFC-383    | WT             | WT            | M      | 0         | 1746 | 14  | 0.80   | 252   | 2.07      |
| MFC-409    | WT             | WT            | F      | 0         | 1252 | 13  | 1.04   | 99    | 2.09      |
| MFC-387    | -/-            | WT            | M      | 0         | 1231 | 14  | 1.14   | 172   | 2.08      |
| MFC-394    | -/-            | WT            | M      | 0         | 1357 | 15  | 1.11   | 217   | 2.09      |
| MFC-399    | -/-            | WT            | F      | 0         | 1275 | 13  | 1.02   | 306   | 2.09      |
| MFC-360    | WT             | RC/RC         | F      | 0         | 1393 | 22  | 1.58   | 379   | 2.08      |
| MFC-365    | WT             | RC/RC         | F      | 0         | 1448 | 18  | 1.24   | 325   | 2.07      |
| MFC-397    | WT             | RC/RC         | M      | 0         | 1626 | 27  | 1.66   | 558   | 2.09      |
| MFC-369    | -/-            | RC/RC         | M      | 0         | 1251 | 35  | 2.80   | 321   | 2.09      |
| MFC-379    | -/-            | RC/RC         | F      | 0         | 1284 | 46  | 3.58   | 692   | 2.07      |
| MFC-381    | -/-            | RC/RC         | M      | 0         | 1258 | 31  | 2.46   | 407   | 2.07      |
| MFC-286    | WT             | WT            | M      | 3.5       | 1672 | 22  | 1.32   | 585   | 2.11      |
| MFC-324    | WT             | WT            | M      | 3.5       | 2080 | 26  | 1.25   | 482   | 2.13      |
| MFC-359    | WT             | WT            | F      | 3.5       | 2152 | 20  | 0.93   | 785   | 2.09      |
| MFC-223    | -/-            | WT            | M      | 3.5       | 1943 | 28  | 1.44   | 395   | 2.12      |
| MFC-300    | -/-            | WT            | M      | 3.5       | 2099 | 26  | 1.24   | 639   | 2.11      |
| MFC-319    | -/-            | WT            | M      | 3.5       | 2258 | 25  | 1.11   | 512   | 2.11      |
| MFC-281    | WT             | RC/RC         | M      | 3.5       | 1715 | 29  | 1.69   | 572   | 2.13      |
| MFC-282    | WT             | RC/RC         | M      | 3.5       | 1786 | 29  | 1.62   | 572   | 2.12      |
| MFC-326    | WT             | RC/RC         | M      | 3.5       | 1929 | 33  | 1.71   | 727   | 2.08      |
| MFC-305    | -/-            | RC/RC         | F      | 3.5       | 1956 | 53  | 2.71   | 1161  | 2.11      |
| MFC-316    | -/-            | RC/RC         | F      | 3.5       | 1664 | 44  | 2.64   | 590   | 2.07      |
| MFC-355    | -/-            | RC/RC         | F      | 3.5       | 1732 | 60  | 3.46   | 733   | 2.07      |
| MFC-262    | WT             | WT            | M      | 12        | 6176 | 72  | 1.17   | 765   | 2.07      |
| MFC-343    | WT             | WT            | F      | 12        | 7570 | 97  | 1.28   | 618   | 2.1       |
| MFC-344    | WT             | WT            | M      | 12        | 7158 | 88  | 1.23   | 767   | 2.04      |
| MFC-245    | -/-            | WT            | F      | 12        | 7219 | 101 | 1.40   | 843   | 2.06      |
| MFC-246    | -/-            | WT            | F      | 12        | 7679 | 99  | 1.29   | 827   | 2.07      |
| MFC-339    | -/-            | WT            | M      | 12        | 7983 | 102 | 1.28   | 786   | 2.07      |
| MFC-254    | WT             | RC/RC         | M      | 12        | 6630 | 124 | 1.87   | 950   | 2.03      |
| MFC-333    | WT             | RC/RC         | M      | 12        | 4690 | 75  | 1.60   | 697   | 2.05      |
| MFC-356    | WT             | RC/RC         | M      | 12        | 3948 | 65  | 1.65   | 646   | 2.07      |
| MFC-225    | -/-            | RC/RC         | M      | 12        | 2945 | 195 | 6.62   | 877   | 2.04      |
| MFC-250    | -/-            | RC/RC         | M      | 12        | 2829 | 150 | 5.30   | 642   | 2.05      |
| MFC-251    | -/-            | RC/RC         | F      | 12        | 2699 | 132 | 4.89   | 630   | 2.09      |

**Supplemental Table 4. Pkhd1<sup>-/-</sup>, Pkd1RC/RC and digenic GSEA****Pkhd1<sup>-/-</sup> GSEA**

| GO term    | Description                              | P-value  | FDR q-value | Enrichment (N, B, n, b)  | Genes (b)                                      |
|------------|------------------------------------------|----------|-------------|--------------------------|------------------------------------------------|
| GO:1905515 | non-motile cilium assembly               | 9.80E-08 | 1.44E-03    | 8.54 (15192,44,485,12)   | Ift80 - intraflagellar transport 80            |
| GO:0060271 | cilium assembly                          | 8.89E-07 | 6.52E-03    | 2.38 (15192,174,1465,40) | Ift81 - intraflagellar transport 81            |
| GO:0006700 | C21-steroid hormone biosynthetic process | 9.84E-07 | 4.81E-03    | 217.03 (15192,6,35,3)    | polypeptide 1                                  |
| GO:0044782 | cilium organization                      | 1.18E-06 | 4.33E-03    | 2.24 (15192,183,1629,44) | Ift81 - intraflagellar transport 81            |
| GO:0042446 | hormone biosynthetic process             | 4.04E-06 | 1.18E-02    | 61.51 (15192,26,38,4)    | polypeptide 1                                  |
| GO:0009855 | determination of bilateral symmetry      | 4.34E-06 | 1.06E-02    | 3.26 (15192,70,1465,22)  | Dyx1c1 - dyslexia susceptibility 1 candidate 1 |
| GO:0042445 | hormone metabolic process                | 4.40E-06 | 9.23E-03    | 21.61 (15192,111,38,6)   | polypeptide 1                                  |
| GO:0009799 | specification of symmetry                | 5.91E-06 | 1.08E-02    | 3.21 (15192,71,1465,22)  | Dyx1c1 - dyslexia susceptibility 1 candidate 1 |
| GO:0061512 | protein localization to cilium           | 5.92E-06 | 9.64E-03    | 6.17 (15192,32,847,11)   | Tmem107 - transmembrane protein 107            |
| GO:0008207 | C21-steroid hormone metabolic process    | 7.29E-06 | 1.07E-02    | 46.04 (15192,12,110,4)   | c18                                            |

**Pkd1RC/RC GSEA**

| GO term    | Description                                   | P-value  | FDR q-value | Enrichment (N, B, n, b)    | Genes (b)                                            |
|------------|-----------------------------------------------|----------|-------------|----------------------------|------------------------------------------------------|
| GO:0006259 | DNA metabolic process                         | 3.69E-13 | 5.42E-09    | 2.37 (15192,585,1062,97)   | Fanci - fanconi anemia, complementation group i      |
| GO:0006996 | organelle organization                        | 5.25E-13 | 3.85E-09    | 1.68 (15192,1723,1043,199) | Hps5 - hermansky-pudlak syndrome 5 homolog           |
| GO:0051276 | chromosome organization                       | 5.74E-13 | 2.81E-09    | 3.03 (15192,241,1146,55)   | Smc4 - structural maintenance of chromosomes 4       |
| GO:0030030 | cell projection organization                  | 4.51E-11 | 1.65E-07    | 2.10 (15192,728,932,94)    | Dock10 - dedicator of cytokinesis 10                 |
| GO:0006281 | DNA repair                                    | 1.35E-10 | 3.96E-07    | 2.47 (15192,382,1031,64)   | Fanci - fanconi anemia, complementation group i      |
| GO:0044782 | cilium organization                           | 4.20E-10 | 1.03E-06    | 2.69 (15192,183,1511,49)   | receptor 2 (flamingo homolog, drosophila)            |
| GO:0007017 | microtubule-based process                     | 7.87E-10 | 1.65E-06    | 1.90 (15192,501,1644,103)  | receptor 2 (flamingo homolog, drosophila)            |
| GO:0007610 | behavior                                      | 8.24E-10 | 1.51E-06    | 1.91 (15192,490,1637,101)  | Npas3 - neuronal pas domain protein 3                |
| GO:0120036 | plasma membrane bounded cell projection or    | 2.12E-09 | 3.46E-06    | 1.90 (15192,523,1513,99)   | receptor 2 (flamingo homolog, drosophila)            |
| GO:0006260 | DNA replication                               | 2.30E-09 | 3.37E-06    | 3.61 (15192,127,1061,32)   | member a                                             |
| GO:0060271 | cilium assembly                               | 2.48E-09 | 3.30E-06    | 2.66 (15192,174,1511,46)   | Celsr2 - cadherin, egf lag seven-pass g-type         |
| GO:1905515 | non-motile cilium assembly                    | 3.37E-09 | 4.11E-06    | 5.84 (15192,44,1064,18)    | Disc1 - disrupted in schizophrenia 1                 |
| GO:0022402 | cell cycle process                            | 7.14E-09 | 8.06E-06    | 1.74 (15192,641,1650,121)  | Fanci - fanconi anemia, complementation group i      |
| GO:1903046 | meiotic cell cycle process                    | 7.45E-09 | 7.80E-06    | 3.35 (15192,127,1178,33)   | Ankle1 - ankyrin repeat and lem domain containing    |
| GO:0016043 | cellular component organization               | 1.12E-08 | 1.09E-05    | 1.25 (15192,3874,1639,523) | Hps5 - hermansky-pudlak syndrome 5 homolog           |
| GO:0032200 | telomere organization                         | 1.84E-08 | 1.69E-05    | 4.00 (15192,66,1381,24)    | Obfc1 - oligonucleotide/oligosaccharide-binding fold |
| GO:0000723 | telomere maintenance                          | 1.84E-08 | 1.59E-05    | 4.00 (15192,66,1381,24)    | Obfc1 - oligonucleotide/oligosaccharide-binding fold |
| GO:0032392 | DNA geometric change                          | 1.85E-08 | 1.51E-05    | 6.91 (15192,29,1062,14)    | cerevisiae)                                          |
| GO:0070192 | chromosome organization involved in meiotic c | 2.27E-08 | 1.75E-05    | 5.24 (15192,46,1135,18)    | cerevisiae)                                          |
| GO:0071103 | DNA conformation change                       | 3.65E-08 | 2.68E-05    | 4.69 (15192,61,1062,20)    | cerevisiae)                                          |
| GO:0071840 | cellular component organization or biogenesis | 6.36E-08 | 4.44E-05    | 1.24 (15192,3961,1639,528) | Hps5 - hermansky-pudlak syndrome 5 homolog           |
| GO:0032508 | DNA duplex unwinding                          | 1.01E-07 | 6.73E-05    | 7.38 (15192,24,1029,12)    | cerevisiae)                                          |

|            |                                              |          |          |                          |                                                 |
|------------|----------------------------------------------|----------|----------|--------------------------|-------------------------------------------------|
| GO:0006270 | DNA replication initiation                   | 1.59E-07 | 1.02E-04 | 6.20 (15192,24,1328,13)  | Pola1 - polymerase (dna directed), alpha 1      |
| GO:0006974 | cellular response to DNA damage stimulus     | 1.89E-07 | 1.15E-04 | 2.22 (15192,588,651,56)  | Fanci - fanconi anemia, complementation group i |
| GO:0120031 | plasma membrane bounded cell projection as:  | 4.64E-07 | 2.72E-04 | 2.12 (15192,256,1511,54) | receptor 2 (flamingo homolog, drosophila)       |
| GO:0006302 | double-strand break repair                   | 6.51E-07 | 3.67E-04 | 2.67 (15192,136,1381,33) | cerevisiae)                                     |
| GO:0120039 | plasma membrane bounded cell projection mc   | 9.96E-07 | 5.41E-04 | 2.63 (15192,232,871,35)  | Dock10 - dedicator of cytokinesis 10            |
| GO:0030031 | cell projection assembly                     | 1.10E-06 | 5.74E-04 | 2.09 (15192,262,1469,53) | receptor 2 (flamingo homolog, drosophila)       |
| GO:0048812 | neuron projection morphogenesis              | 1.42E-06 | 7.18E-04 | 2.62 (15192,226,871,34)  | Dock10 - dedicator of cytokinesis 10            |
| GO:0048858 | cell projection morphogenesis                | 1.64E-06 | 8.04E-04 | 2.58 (15192,237,871,35)  | Dock10 - dedicator of cytokinesis 10            |
| GO:0007626 | locomotory behavior                          | 1.77E-06 | 8.39E-04 | 2.25 (15192,173,1637,42) | membrane 2                                      |
| GO:0061512 | protein localization to cilium               | 2.42E-06 | 1.11E-03 | 5.95 (15192,32,957,12)   | Ift140 - intraflagellar transport 140           |
| GO:0006310 | DNA recombination                            | 2.61E-06 | 1.16E-03 | 2.43 (15192,148,1479,35) | Brca2 - breast cancer 2                         |
| GO:1903047 | mitotic cell cycle process                   | 3.19E-06 | 1.38E-03 | 1.78 (15192,387,1650,75) | Fanci - fanconi anemia, complementation group i |
| GO:0007049 | cell cycle                                   | 3.21E-06 | 1.35E-03 | 2.14 (15192,662,535,50)  | Hfm1 - hfm1, atp-dependent dna helicase homolog |
| GO:0000226 | microtubule cytoskeleton organization        | 5.58E-06 | 2.27E-03 | 2.00 (15192,289,1392,53) | Dynl1b - dynein light chain tctex-type 1b       |
| GO:0006694 | steroid biosynthetic process                 | 5.68E-06 | 2.25E-03 | 11.50 (15192,76,139,8)   | polypeptide 1                                   |
| GO:0045005 | DNA-dependent DNA replication maintenance    | 5.69E-06 | 2.19E-03 | 4.39 (15192,30,1615,14)  | Brca2 - breast cancer 2                         |
| GO:0051053 | negative regulation of DNA metabolic process | 6.46E-06 | 2.43E-03 | 2.61 (15192,122,1479,31) | cerevisiae)                                     |
| GO:0007611 | learning or memory                           | 7.64E-06 | 2.80E-03 | 2.04 (15192,218,1603,47) | Ttk1 - tau tubulin kinase 1                     |
| GO:0007018 | microtubule-based movement                   | 8.16E-06 | 2.92E-03 | 4.82 (15192,207,213,14)  | Dnah8 - dynein, axonemal, heavy chain 8         |
| GO:0051656 | establishment of organelle localization      | 8.46E-06 | 2.95E-03 | 2.26 (15192,251,1043,39) | Syt11 - synaptotagmin xi                        |
| GO:0051640 | organelle localization                       | 8.96E-06 | 3.05E-03 | 1.78 (15192,370,1618,70) | Ntn1 - netrin 1                                 |

#### Digenic GSEA

| GO term    | Description                                 | P-value  | FDR q-value | Enrichment (N, B, n, b)  | Genes (b)                                             |
|------------|---------------------------------------------|----------|-------------|--------------------------|-------------------------------------------------------|
| GO:0061512 | protein localization to cilium              | 3.00E-06 | 2.09E-03    | 5.85 (15192,32,974,12)   | Ift140 - intraflagellar transport 140                 |
| GO:1905515 | non-motile cilium assembly                  | 4.98E-06 | 3.04E-03    | 5.31 (15192,44,845,13)   | Dync2h1 - dynein cytoplasmic 2 heavy chain 1          |
| GO:0007368 | determination of left/right symmetry        | 3.87E-06 | 2.47E-03    | 3.77 (15192,69,1111,19)  | expression)                                           |
| GO:0009855 | determination of bilateral symmetry         | 5.09E-06 | 2.99E-03    | 3.71 (15192,70,1111,19)  | expression)                                           |
| GO:0009799 | specification of symmetry                   | 6.40E-06 | 3.24E-03    | 3.66 (15192,71,1111,19)  | expression)                                           |
| GO:0044782 | cilium organization                         | 2.33E-08 | 4.27E-05    | 2.84 (15192,183,1111,38) | receptor 2 (flamingo homolog, drosophila)             |
| GO:0060271 | cilium assembly                             | 2.03E-07 | 2.98E-04    | 2.75 (15192,174,1111,35) | receptor 2 (flamingo homolog, drosophila)             |
| GO:0010810 | regulation of cell-substrate adhesion       | 8.59E-07 | 7.87E-04    | 2.55 (15192,178,1204,36) | Itga5 - integrin alpha 5 (fibronectin receptor alpha) |
| GO:0120031 | plasma membrane bounded cell projection as: | 1.65E-06 | 1.28E-03    | 2.30 (15192,256,1111,43) | receptor 2 (flamingo homolog, drosophila)             |
| GO:0043547 | positive regulation of GTPase activity      | 1.25E-06 | 1.08E-03    | 2.29 (15192,181,1542,42) | Tbc1d8b - tbc1 domain family, member 8b               |
| GO:0000226 | microtubule cytoskeleton organization       | 3.52E-10 | 1.72E-06    | 2.27 (15192,289,1598,69) | 1                                                     |
| GO:0030031 | cell projection assembly                    | 3.29E-06 | 2.19E-03    | 2.24 (15192,262,1111,43) | receptor 2 (flamingo homolog, drosophila)             |
| GO:0043087 | regulation of GTPase activity               | 7.49E-07 | 7.33E-04    | 2.16 (15192,251,1428,51) | Tbc1d8b - tbc1 domain family, member 8b               |
| GO:0070925 | organelle assembly                          | 1.47E-06 | 1.20E-03    | 2.11 (15192,389,979,53)  | receptor 2 (flamingo homolog, drosophila)             |

|            |                                                |          |          |                            |                                                  |
|------------|------------------------------------------------|----------|----------|----------------------------|--------------------------------------------------|
| GO:0032989 | cellular component morphogenesis               | 5.66E-07 | 6.39E-04 | 2.05 (15192,430,1052,61)   | receptor 2 (flamingo homolog, drosophila)        |
| GO:0010769 | regulation of cell morphogenesis involved in d | 5.99E-06 | 3.25E-03 | 2.00 (15192,274,1439,52)   | Ntn1 - netrin 1                                  |
| GO:0051656 | establishment of organelle localization        | 6.46E-06 | 3.16E-03 | 1.98 (15192,251,1589,52)   | 1                                                |
| GO:0007017 | microtubule-based process                      | 3.62E-10 | 1.33E-06 | 1.94 (15192,501,1598,102)  | receptor 2 (flamingo homolog, drosophila)        |
| GO:0007010 | cytoskeleton organization                      | 1.37E-12 | 1.01E-08 | 1.91 (15192,651,1598,131)  | 1                                                |
| GO:0030029 | actin filament-based process                   | 6.16E-06 | 3.23E-03 | 1.88 (15192,302,1632,61)   | Bcar1 - breast cancer anti-estrogen resistance 1 |
| GO:0120036 | plasma membrane bounded cell projection or     | 1.45E-08 | 3.55E-05 | 1.83 (15192,523,1591,100)  | receptor 2 (flamingo homolog, drosophila)        |
| GO:0051493 | regulation of cytoskeleton organization        | 7.08E-07 | 7.41E-04 | 1.79 (15192,444,1607,84)   | 1                                                |
| GO:0030030 | cell projection organization                   | 1.45E-09 | 4.27E-06 | 1.76 (15192,728,1491,126)  | receptor 2 (flamingo homolog, drosophila)        |
| GO:0022402 | cell cycle process                             | 5.16E-06 | 2.91E-03 | 1.61 (15192,641,1527,104)  | 1                                                |
| GO:0006928 | movement of cell or subcellular component      | 1.78E-06 | 1.30E-03 | 1.57 (15192,957,1308,129)  | receptor 2 (flamingo homolog, drosophila)        |
| GO:0006996 | organelle organization                         | 2.74E-13 | 4.02E-09 | 1.53 (15192,1723,1637,284) | Myh14 - myosin, heavy polypeptide 14             |
| GO:0033043 | regulation of organelle organization           | 4.52E-07 | 6.02E-04 | 1.49 (15192,1084,1607,171) | 1                                                |
| GO:0051128 | regulation of cellular component organization  | 1.72E-08 | 3.61E-05 | 1.40 (15192,2123,1394,273) | Ntn1 - netrin 1                                  |
| GO:0016043 | cellular component organization                | 5.65E-08 | 9.20E-05 | 1.24 (15192,3874,1602,508) | Hps5 - hermansky-pudlak syndrome 5 homolog       |
| GO:0071840 | cellular component organization or biogenesis  | 5.16E-07 | 6.31E-04 | 1.22 (15192,3961,1602,511) | Hps5 - hermansky-pudlak syndrome 5 homolog       |

Species used: Mus musculus

The system has recognized 16595 genes out of 18049 gene terms entered by the user.

16594 genes were recognized by gene symbol and 1 genes by other gene IDs .

63 duplicate genes were removed (keeping the highest ranking instance of each gene) leaving a total of 16532 genes.

Only 15192 of these genes are associated with a GO term.

[The GOrrilla database is periodically updated using the GO database and other sources.](#)

The GOrrilla database was last updated on Dec 23, 2017

**P-value** is the enrichment p-value computed according to the mHG model. This p-value is not corrected for multiple testing of 14663 GO terms.

**FDR q-value** is the correction of the above p-value for multiple testing using the Benjamini and Hochberg (1995) method.

Namely, for the  $i^{\text{th}}$  term (ranked according to p-value) the FDR q-value is  $(p\text{-value} * \text{number of GO terms}) / i$ .

**Enrichment (N, B, n, b)** is defined as follows:

N - is the total number of genes

B - is the total number of genes associated with a specific GO term

n - is the number of genes in the top of the user's input list or in the target set when appropriate

b - is the number of genes in the intersection

Enrichment =  $(b/n) / (B/N)$



**Supplemental Table 5. Merged annotated gene list extracted from GO:0044782, GO:0060271, GO:0061512, GO:1905515 using the Gene Ontology Consortium (<http://amigo.geneontology.org/amigo/>) gene**

|          |          |               |          |         |
|----------|----------|---------------|----------|---------|
| Foxj1    | Tekt2    | Tmem231       | Csnk1d   | Ube2b   |
| Ttll1    | Parva    | Nme7          | Atg5     | Bbs5    |
| Cep135   | Trove2   | Gorab         | Ift20    | Spata7  |
| Bbs2     | Ift74    | Ubxn10        | Tmem216  | Hspb11  |
| Ccp110   | Rab23    | Unc119b       | Tmem138  | Spef2   |
| Cfap54   | Asap1    | Dzip1         | Exoc5    | Fam161a |
| Htt      | Ift88    | Vangl2        | Ttll3    | Dnah7c  |
| Ablim1   | Tmem107  | Sept9         | Arl6     | Avil    |
| Poc1a    | Cep78    | Kif24         | Rsph4a   | Mak     |
| Rilp     | Pcm1     | 2700049A03Rik | Tekt5    |         |
| Kif17    | Rab29    | Ccdc103       | Dnaic2   |         |
| Rfx2     | Ift22    | E2f4          | Tulp1    |         |
| Dnm2     | Kif27    | Cluap1        | Iqcg     |         |
| Ift81    | Dnaic1   | Kctd17        | Ttc30b   |         |
| Kif3a    | Arhgap35 | Fnbp11        | Arf4     |         |
| Pcnt     | Snx10    | Snap29        | Wwtr1    |         |
| Map4     | Mkks     | Atmin         | Bbs1     |         |
| Stil     | Ptpn23   | Ccdc28b       | Tub      |         |
| Traf3ip1 | Tmem80   | Cyld          | Gsn      |         |
| Rpgr     | Wdpcp    | 1810043G02Rik | Tmem67   |         |
| Spag16   | Tulp4    | Tctn3         | Ick      |         |
| Ift80    | Pibf1    | Ift43         | Lztf1    |         |
| Spag17   | Dnah1    | Actr3         | Ift57    |         |
| Tmem237  | Cep97    | Ttc17         | Ttc30a1  |         |
| Poc1b    | Odf2     | Rab8a         | Rilp2    |         |
| Cep83    | Rilp1    | Bbs10         | Zmynd10  |         |
| Rab17    | Bbs12    | Cfap20        | Nme5     |         |
| Cby1     | Dnaaf1   | Tulp2         | Bbip1    |         |
| Wdr60    | Gas8     | Ablim3        | Ttc26    |         |
| Evi5l    | Tctn1    | B9d2          | Dync2li1 |         |
| Dyx1c1   | Pqbp1    | Tmem141       | Ttc30a2  |         |
| Ocl      | Spata6   | Ptpdc1        | Wdr5     |         |
| Cenpj    | Ssx2ip   | Ift46         | Arl13b   |         |
| Ehd1     | Dnaaf2   | Ccdc39        | Mks1     |         |
| Lrguk    | Ift52    | Eno4          | Fopnl    |         |
| Dnah12   | Rab3ip   | Vdac3         | Trim59   |         |
| Dctn1    | Klc3     | Fuz           | Ak7      |         |
| Ccdc114  | Actr2    | Tctn2         | Wdr5b    |         |
| Wrap73   | Tbc1d7   | Nudcd3        | Arl3     |         |
| Ttbk2    | Tulp3    | Tctex1d2      | Tekt1    |         |
| Neur1a   | Lca5     | Tpgs1         | Tap1     |         |
| Cep120   | Ehd3     | Wdr34         | Rsph9    |         |
| Dnal1    | Hap1     | Dynll2        | Cdc14a   |         |
| Ift27    | Atg3     | Intu          | Tmem17   |         |
| Ahi1     | Ssna1    | Dnah5         | Adamts16 |         |
| Ofd1     | Tbc1d30  | Bbs4          | Ulk4     |         |
| Rabl2    | Sept2    | Dnhd1         | Fam92a   |         |
| Sept7    | Gm20695  | Efcab7        | Iqcb1    |         |
| Rsph1    | Ccdc151  | Tchp          | Ccdc183  |         |
| Cep89    | Atxn10   | Atp6v1d       | B9d1     |         |
